# Supplementary material for: NADC30-like Strain of Porcine Reproductive and Respiratory Syndrome Virus, China
Source: PubMed Central journal article supplement (PMC4672414; doi:10.3201/eid2112.150360), 2015-12
Supplement: 15-0360-Techapp-s1.pdf [file 15-0360-Techapp-s1.pdf]

# NADC30-like Strain of Porcine Reproductive and Respiratory Syndrome Virus, China

## Technical Appendix

### Additional information on NADC30-like strain of porcine reproductive and respiratory syndrome virus, China

**Technical Appendix Table.** Nucleotide and amino acid identities of viral proteins of porcine reproductive and respiratory syndrome virus CHsx1401 and other representative strains

| Protein*      | Isolate, country/year of isolation, % identity |      |                  |      |                  |      |                  |      |                    |      |                   |      |
|---------------|------------------------------------------------|------|------------------|------|------------------|------|------------------|------|--------------------|------|-------------------|------|
|               | NADC30, USA/2008                               |      | MN184A, USA/2001 |      | MN184B, USA/2001 |      | MN184C, USA/2001 |      | JXwn06, China/2006 |      | VR-2332, USA/1992 |      |
|               | nt                                             | aa   | nt               | aa   | nt               | aa   | nt               | aa   | nt                 | aa   | nt                | aa   |
| NSP1 $\alpha$ | 95.8                                           | 95.8 | 88.1             | 93.9 | 88.1             | 93.9 | 88.7             | 94.5 | 86.5               | 95.2 | 88.5              | 95.8 |
| NSP1 $\beta$  | 95.6                                           | 92.2 | 85.2             | 82.6 | 86.1             | 84.4 | 86.2             | 84.4 | 79.8               | 75.2 | 80.6              | 76.1 |
| NSP2          | 94.0                                           | 91.2 | 82.9             | 78.2 | 83.7             | 79.5 | 83.4             | 78.8 | 74.4               | 66.9 | 77.2              | 70.4 |
| NSp3          | 96.9                                           | 98.0 | 84.6             | 90.6 | 84.8             | 90.6 | 85.0             | 90.8 | 83.0               | 90.4 | 86.0              | 90.1 |
| NSP4          | 96.1                                           | 97.5 | 82.7             | 91.7 | 83.2             | 93.6 | 82.7             | 91.7 | 84.5               | 93.6 | 85.1              | 93.1 |
| NSP5          | 96.1                                           | 95.3 | 87.5             | 91.2 | 88.8             | 90.6 | 82.9             | 85.9 | 87.6               | 89.4 | 88.6              | 90.0 |
| NSP6          | 89.6                                           | 93.8 | 83.3             | 93.8 | 83.3             | 93.8 | 79.2             | 93.8 | 83.3               | 87.5 | 83.3              | 93.8 |
| NSP7          | 96.5                                           | 96.5 | 86.7             | 88.4 | 86.5             | 88.8 | 86.6             | 88.8 | 82.1               | 83.0 | 86.2              | 88.4 |
| NSP8          | 98.6                                           | 97.8 | 93.5             | 95.7 | 92.8             | 93.5 | 93.5             | 95.7 | 89.9               | 93.5 | 91.3              | 93.5 |
| NSP9          | 97.1                                           | 98.3 | 90.7             | 94.9 | 90.9             | 95.5 | 91.2             | 95.7 | 87.4               | 96.9 | 88.9              | 96.3 |
| NSP10         | 96.3                                           | 99.1 | 92.5             | 98.0 | 92.3             | 98.0 | 92.4             | 98.2 | 85.1               | 95.2 | 85.8              | 95.5 |
| NSP11         | 91.5                                           | 95.1 | 89.2             | 94.6 | 89.2             | 94.2 | 89.4             | 94.6 | 91.6               | 95.5 | 96.3              | 97.8 |
| NSP12         | 95.5                                           | 95.5 | 85.1             | 90.9 | 85.1             | 90.9 | 85.1             | 90.9 | 88.1               | 94.8 | 87.0              | 92.9 |
| ORF2a/GP2a†   | 95.6                                           | 95.3 | 85.9             | 86.8 | 85.9             | 86.4 | 85.9             | 86.8 | 86.9               | 87.5 | 87.9              | 90.3 |
| ORF2b/E       | 95.0                                           | 91.9 | 91.9             | 91.9 | 91.9             | 91.9 | 91.4             | 91.9 | 91.0               | 87.8 | 90.5              | 86.5 |
| ORF3/GP3      | 97.0                                           | 96.5 | 83.5             | 83.1 | 83.4             | 83.5 | 83.5             | 83.9 | 83.8               | 81.2 | 83.7              | 82.0 |
| ORF4/GP4      | 96.6                                           | 97.8 | 89.4             | 88.8 | 89.4             | 88.3 | 89.6             | 88.8 | 85.3               | 88.8 | 86.8              | 87.2 |
| ORF5/GP5      | 94.7                                           | 94.0 | 88.6             | 87.6 | 89.1             | 88.6 | 89.1             | 88.6 | 85.7               | 85.6 | 85.2              | 83.6 |
| ORF6/M        | 97.3                                           | 97.7 | 88.8             | 94.9 | 88.8             | 94.9 | 89.1             | 94.9 | 88.8               | 93.1 | 89.9              | 92.6 |
| ORF7/N        | 95.4                                           | 94.4 | 89.0             | 87.9 | 88.4             | 87.1 | 89.0             | 87.9 | 86.6               | 83.9 | 89.8              | 88.7 |

\*NSP, nonstructural protein; ORF, open reading frame; GP, glycoprotein; E, envelope; M, membrane; N, nucleocapsid.

†Indicates genes of each open reading frame and their coded proteins, respectively.

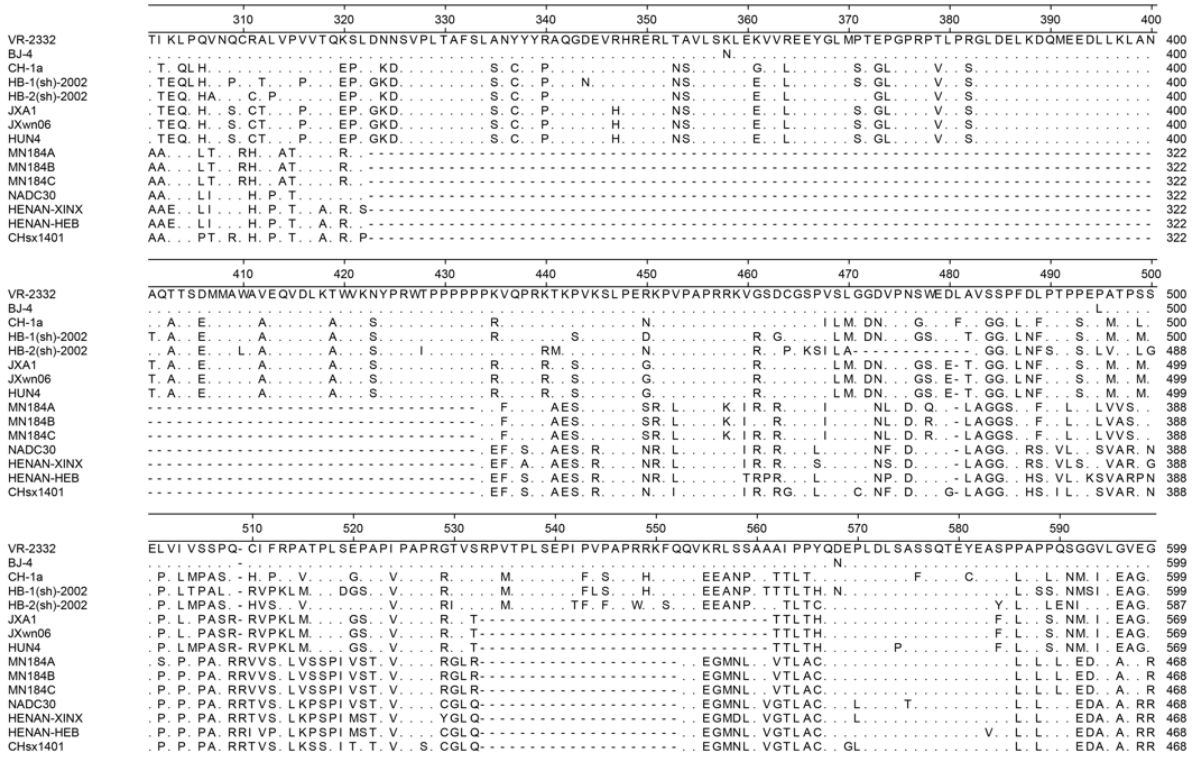

**Technical Appendix Figure.** Alignment of amino acid sequences of highly variable regions of nonstructural protein of porcine reproductive and respiratory syndrome viruses NADC30-like CHsx1401 (GenBank accession no. KP861625); representative prototype strain VR-2332 (U87392); isolates BJ-4 (AF331831), CH-1a (AY032626), HB-1(sh)/2002 (AY150312), and HB-2(sh)/2002 (AY262352) from China; highly pathogenic strains JXA1 (EF112445), JXwn06 (EF641008), and HUN4 (EF635006); strains MN184A (DQ176019), MN184B (DQ176020), MN184C (EF488739), and NADC30 (JN654459) from the United States; and recent strains HENAN-HEB (KJ143621) and HENAN-XINX (KF611905) from China. Dots indicate conserved residues, and hyphens dashes indicate deleted residues. Positions of deleted amino acids were determined on the basis of the genome of PRRVS strain VR-2332.
